# Supplementary material for: Levels of soluble complement regulators predict severity of COVID-19 symptoms
Source: Front Immunol. 2022 Oct 18;13:1032331. doi: 10.3389/fimmu.2022.1032331 (PMC9624227; doi:10.3389/fimmu.2022.1032331)
Supplement: Supplementary file 2 [file DataSheet_2.docx]

**The CITIID-NIHR BioResource COVID-19 Collaboration Authorship Banner**

Stephen Baker2,6, John Bradley1,3,6,11,15 , Patrick Chinnery3,23,24, Daniel Cooper11, 25,

Gordon Dougan2,6, Ian Goodfellow7, Ravindra Gupta2,6,13,16, Nathalie Kingston3,4, Paul J. Lehner2,6,13, Paul A. Lyons2,6, Nicholas J. Matheson2,6,13,33, Caroline Saunders9, Kenneth G. C. Smith2,6, Charlotte Summers6,12,26, James Thaventhiran19, M. Estee Torok 6,13,14, Mark R. Toshner6,8,26, Michael P. Weekes2,6,13,34, Gisele Alvio9, Sharon Baker9, Areti Bermperi9, Karen Brookes9, Ashlea Bucke, Jo Calder, Laura Canna, Cherry Crucusio, Isabel Cruz9, Ranalie de Jesus9, Katie Dempsey9, Giovanni Di Stephano9, Jason Domingo9, Anne Elmer9, Julie Harris, Sarah Hewitt, Heather Jones9, Sherly Jose9, Jane Kennet, Yvonne King, , Jenny Kourampa9, Emily Li, Caroline McMahon9, Anne Meadows, Vivien Mendoza9, Criona O’Brien, Charmain Ocaya9, Ciro Pasquale9, Marlyn Perales9, Jane Price, Rebecca Rastall, Carla Ribeiro9, Jane Rowlands, Valentina Ruffolo, Hugo Tordesillas, Phoebe Vargas9, Bensi Vergese9, Laura Watson9, Jieniean Worsley9, Julie-Ann Zerrudo9, Laura Bergamashi2,6, Ariana Betancourt, Georgie Bower, Ben Bullman, Chiara Cossetti, Aloka De Sa, Benjamin J. Dunmore, Maddie Epping, Stuart Fawke, Stefan Gräf 3,6, Richard Grenfell, Andrew Hinch, Josh Hodgson, Christopher Huang, Oisin Huhn, Kelvin Hunter2,6, Isobel Jarvis, Emma Jones, Maša Josipović, Ekaterina Legchenko, Daniel Lewis, Joe Marsden, Jennifer Martin, Federica Mescia2,6, Ciara O’Donnell, Ommar Omarjee, Marianne Perera, Linda Pointon, Nicole Pond, Nathan Richoz, Nika Romashova, Natalia Savoinykh, Rahul Sharma, Joy Shih, Mateusz Strezlecki, Rachel Sutcliffe, Tobias Tilly, Zhen Tong, Carmen Treacy, Lori Turner, Jennifer Wood, Marta Wylot,John Allison3,4, Heather Biggs3,18, John R. Bradley1,3,6,11,15, Helen Butcher3,5, Daniela Caputo3,5, Matt Chandler3,5, Patrick Chinnery3,23,24, Debbie Clapham-Riley3,5, Eleanor Dewhurst3,5, Christian Fernandez3, Anita Furlong3,5, Barbara Graves3,5, Jennifer Gray3,5, Sabine Hein3,5, Tasmin Ivers3,5, Emma Le Gresley3,5, Rachel Linger3,5, Mary Kasanicki3,11, Rebecca King3,5, Nathalie Kingston3,4, Sarah Meloy3,5, Alexei Moulton3,5, Francesca Muldoon3,5, Nigel Ovington3,4, Sofia Papadia3,5, Christopher J. Penkett3,4, Isabel Phelan3,5, Venkatesh Ranganath3,4, Roxana Paraschiv3,4, Abigail Sage3,5, Jennifer Sambrook3,4, Ingrid Scholtes3,5, Katherine Schon3,17,18, Hannah Stark3,5, Kathleen E. Stirrups3,4, Paul Townsend3,4, Neil Walker3,4, Jennifer Webster3,5, Mayurun Selvan35, Petra, Polgarova12,Sarah L. Caddy2,6, Laura G. Caller20,21, Yasmin Chaudhry7, Martin D. Curran22, Theresa Feltwell6, Stewart Fuller20, Iliana Georgana7, Grant Hall7, William L. Hamilton6,13,14, Myra Hosmillo7, Charlotte J. Houldcroft6, Rhys Izuagbe7, Aminu S. Jahun7, Fahad A. Khokhar2,6, Anna G. Kovalenko7, Luke W. Meredith7, Surendra Parmar22, Malte L. Pinckert7, Anna Yakovleva7, Emily C. Horner19, Lucy Booth19, Alexander Ferreira19, Rebecca Boston19, Robert Hughes19, Juan Carlos Yam Puc19, Nonantzin Beristain-Covarrubias19, Maria Rust19, Thevinya Gurugama19, Lihinya Gurugama19, Thomas Mulroney19, Sarah Spencer19, Zhaleh Hosseini19, Kate Williamson19.

1NIHR Cambridge Biomedical Research Centre, Cambridge Biomedical Campus, Cambridge, UK
2Cambridge Institute of Therapeutic Immunology and Infectious Disease (CITIID), Jeffrey Cheah Biomedical Centre, Cambridge Biomedical Campus, Cambridge, UK

3NIHR BioResource, Cambridge University Hospitals NHS Foundation Trust, Cambridge Biomedical Campus, Cambridge, UK

4Department of Haematology, School of Clinical Medicine, University of Cambridge, Cambridge Biomedical Campus, Cambridge, UK

5Department of Public Health and Primary Care, School of Clinical Medicine, University of Cambridge, Cambridge Biomedical Campus, Cambridge, UK

6Department of Medicine, School of Clinical Medicine, University of Cambridge, Cambridge Biomedical Campus, Cambridge, UK

7Division of Virology, Department of Pathology, University of Cambridge, Cambridge, UK

8Royal Papworth Hospital NHS Foundation Trust, Cambridge, UK

9Cambridge Clinical Research Centre, Addenbrooke’s Hospital, Cambridge University Hospitals NHS Foundation Trust, Cambridge, UK

10Intensive Care Unit, Royal Papworth Hospital NHS Foundation Trust, Cambridge, UK

11Addenbrooke’s Hospital, Cambridge University Hospitals NHS Foundation Trust, Cambridge Biomedical Campus, Cambridge, UK

12Intensive Care Unit, Addenbrooke’s Hospital, Cambridge University Hospitals NHS Foundation Trust, Cambridge Biomedical Campus, Cambridge, UK

13Department of Infectious Diseases, Addenbrooke’s Hospital, Cambridge University NHS Hospitals Foundation Trust, Cambridge, UK

14Department of Microbiology, Addenbrooke’s Hospital, Cambridge University NHS Hospitals Foundation Trust, Cambridge, UK

15Department of Renal Medicine, Addenbrooke’s Hospital, Cambridge University Hospitals NHS Foundation Trust, Cambridge, UK

16Africa Health Research Institute, Durban, South Africa

17Clinical Genetics, Addenbrooke’s Hospital, Cambridge University Hospitals NHS Foundation Trust, Cambridge, UK

18Department of Clinical Neurosciences, School of Clinical Medicine, University of Cambridge, Cambridge Biomedical Campus, Cambridge, UK

19MRC Toxicology Unit, Gleeson Building, Tennis Court Road, Cambridge, UK

20University of Cambridge, Cambridge, UK

21The Francis Crick Institute, London, UK

22Public Health England, Clinical Microbiology and Public Health Laboratory, Cambridge, UK

23Department of Clinical Neurosciences, School of Clinical Medicine, University of Cambridge, Cambridge Biomedical Campus, Cambridge, UK

24Medical Research Council Mitochondrial Biology Unit, Cambridge Biomedical Campus, Cambridge, UK

25Global and Tropical Health Division, Menzies School of Heath Research and Charles Darwin University, Darwin, Northern Territory, Australia

26Heart and Lung Research Institute, Cambridge Biomedical Campus, Cambridge, UK

27Department of Rheumatology, Addenbrooke’s Hospital, Cambridge University Hospitals NHS Foundation Trust, Cambridge, UK

28Cambridge Cancer Trials Centre, Addenbrooke’s Hospital, Cambridge University Hospitals NHS Foundation Trust, Cambridge, UK

29Department of Paediatrics, University of Cambridge, Cambridge Biomedical Campus, Cambridge, UK

30Patient Safety, Addenbrooke’s Hospital, Cambridge University Hospitals NHS Foundation Trust, Cambridge, UK

31Clinical Research Network: Eastern, Addenbrooke’s Hospital, Cambridge University Hospitals NHS Foundation Trust, Cambridge, UK

32Institute of Metabolic Science, Addenbrooke’s Hospital, Cambridge University Hospitals NHS Foundation Trust, Cambridge, UK

33NHS Blood and Transplant, Cambridge, UK

34Cambridge Institute for Medical Research, Biomedical Campus, Hills Rd, Cambridge UK

35 Department of Respiratory Medicine, Cambridge University Hospitals NHS Foundation Trust, Cambridge, UK
